# Supplementary material
Source: PubMed Central journal article supplement (PMC2929678)
Supplement: NIHMS228627-supplement-1_si_001.pdf [file NIHMS228627-supplement-1_si_001.pdf]

# Characterization of the Epoxide Hydrolase NcsF2 from the Neocarzinostatin Biosynthetic Gene Cluster

Shuangjun Lin,<sup>†</sup> Geoffrey P. Horsman,<sup>†</sup> and Ben Shen<sup>\*,†,‡,§</sup>

<sup>†</sup>*Division of Pharmaceutical Sciences, ‡University of Wisconsin National Cooperative Drug Discovery Group, and §Department of Chemistry, University of Wisconsin-Madison, Madison, Wisconsin 53705, USA*

bshen@pharmacy.wisc.edu

## Supporting Information

|                                                                    |    |
|--------------------------------------------------------------------|----|
| General experimental procedures                                    | S2 |
| Cloning, overproduction, and purification of NcsF1 and NcsF2       | S2 |
| EH activity assays with styrene oxide as a substrate mimic         | S2 |
| Large-scale reaction with NcsF2                                    | S3 |
| Enantioconvergent reaction using NcsF2/SgcF co-catalysis           | S3 |
| Figure S1. SDS-PAGE analysis of purified NcsF1 and NcsF2           | S4 |
| Figure S2. Sequence alignment of NcsF1 and NcsF2 with selected EHs | S5 |
| References                                                         | S6 |

## General experimental procedures

Substrates including racemic styrene oxide, (*R*)-styrene oxide, and (*S*)-styrene oxide, and products including racemic 1-phenyl-1, 2-ethanediol, (*R*)-1-phenyl-1, 2-ethanediol, (*S*)-1-phenyl-1, 2-ethanediol, and [<sup>18</sup>O]-H<sub>2</sub>O were purchased from Sigma-Aldrich (St. Louis, MO). Dithiothreitol (DTT) was purchased from Research Products International Corp (Mt. Prospect, IL). Complete protease inhibitor tablet, EDTA-free, was from Roche Applied Science (Indianapolis, IN). Medium components and buffers were from Fisher Scientific (Pittsburgh, PA). Synthetic DNA oligonucleotides were purchased from the University of Wisconsin-Madison Biotechnology Center. PCR was performed with a PerkinElmer GeneAmp 2400. Electrospray ionization-mass spectroscopy (ESI-MS) was performed with an Agilent 1100 MSD SL ion trap mass spectrometer (Agilent Technologies, Inc. Santa Clara, CA). NMR spectra were recorded using a Varian UI-500 spectrometer (Varian, Inc., Palo Alto, CA). High performance liquid chromatography (HPLC) analyses were carried out on a Varian HPLC system equipped with Prostar 210 pumps, a photodiode array (PDA) detector, and an Alltech Appollo C18 reverse phase column (5 μm, 4.6 × 250 mm, Grace Davison Discovery Sciences, Deerfield, IL), using a 20 min linear gradient from 0 to 60% acetonitrile in water. The enantiomeric separation was performed on a Waters HPLC system equipped with 600 pumps, a 996 photodiode array (PDA) detector, and a Chiralcel OD-H chiral column (5 μm, 4.6 × 250 mm, Grace Davison Discovery Sciences) using a 60 min isocratic elution with 2.5% isopropanol in *n*-hexane.

## Cloning, overproduction, and purification of NcsF1 and NcsF2

The gene encoding NcsF1 and NcsF2 were amplified by PCR from cosmid pBS5004<sup>1</sup> as template. PCRs were performed with Platinum Pfx polymerase (Invitrogen, Carlsbad, CA) using the following primers: forward 5'- GAC GAC GAC AAG ATG CGG CCG TTT CAG GTC C -3' and reverse 5'- GAG GAG AAG CCC GG TCA GAG CTT CTT GAG TGT CC -3' for NcsF1; forward 5'- GAC GAC GAC AAG ATG GAG CCG TTC CGT ATA G -3' and reverse 5'- GAG GAG AAG CCC GGT CTA GGA CGT CCG CAG CG -3' (starting and stop codons underlined) for NcsF2. The gel-purified PCR products were directly cloned into the pCDF-2 Ek/LIC vector using ligation-independent cloning as described by Novagen (Madison, WI) to give pBS5041 (for NcsF1) and pBS5042 (for NcsF2) for *E. coli* expression. The over-expression in *E. coli* BL21 (DE3) and purification of the recombinant protein by affinity chromatography using NTA-Ni agarose column (Qiagen, Valencia, CA) were performed following the previously described procedure for SgcF purification.<sup>2</sup> After the purified protein was desalted using a PD-10 column (GE Healthcare, Piscataway, NJ) twice to completely remove glycerol and then concentrated with a 10 K MWCO Vivaspin ultrafiltration device (Sartorius, Edgewood, NY), the NcsF2 protein was stored at -80 °C in 100 μL aliquots. The purity of the purified protein was assessed by 12% SDS-PAGE and the concentration was determined from the absorbance at 280 nm using a molar absorptivity ( $\epsilon = 68.41 \text{ mM}^{-1} \text{ cm}^{-1}$  for NcsF1, 82.34 for NcsF2) calculated using the program Protparam (<http://www.expasy.ch/tools/protparam.html>).

## EH activity assays with styrene oxide as a substrate mimic

HPLC-based assays were carried out in 200  $\mu\text{L}$  reaction mixtures containing 2 mM racemic styrene oxide and 50 mM phosphate buffer (pH 7.5). The reaction was initiated by the addition of 50  $\mu\text{M}$  enzyme (NcsF1 or NcsF2) and incubated at 25  $^{\circ}\text{C}$  for 1 h. The reaction was quenched by extraction with 200  $\mu\text{L}$  ethyl acetate for three times and organic extracts were combined. After solvent was removed using a speed-vac, the resulting residue was dissolved in 50  $\mu\text{L}$  acetonitrile and 25  $\mu\text{L}$  was subjected to HPLC analysis. Control reactions were carried out under the identical conditions except with enzyme that had been boiled for 5 min.

To determine the kinetic parameters of NcsF2-catalyzed hydrolysis of styrene oxide, a spectrophotometric assay method was adopted to achieve continuous and accurate determination of epoxide hydrolase activity.<sup>3,4</sup> Prior to kinetic analysis, the optimal pH for NcsF2 activity was tested in three different buffers: 50 mM sodium acetate (pH 5.0, 5.5, and 6.0); 50 mM sodium phosphate buffer (pH 5.5 to pH 8.5); and 50 mM glycine-NaOH (pH 8.5, 9.0, and 10.0). The reactions were carried out in 1 mL mixture containing 10  $\mu\text{L}$  of 300 mM sodium periodate in DMF, 20  $\mu\text{L}$  of 5 M styrene oxide in DMSO, and 50 mM buffer. The reactions were initiated by the addition of NcsF2 and carried out in triplicate. The absorbance at 290 nm was monitored in a 1-mL quartz cell and the velocity was calculated based on the rate of change of absorbance over several minutes. Steady-state kinetic parameters were obtained from reactions carried out in 50 mM phosphate buffer (pH 8.0) with varying styrene oxide concentrations [0.1-6.4 mM for (*R*)-styrene oxide with 2  $\mu\text{M}$  NcsF2 and 1-16 mM for (*S*)-styrene oxide with 8  $\mu\text{M}$  NcsF2]. The Michaelis-Menten equation was fitted to plots of velocity of 1-phenyl-1, 2-ethanediol formation versus substrate concentration to extract values for  $K_M$  and  $k_{\text{cat}}$ .

### Large scale reaction of NcsF2

To prepare sufficient quantities of product for NMR characterization, a reaction was carried out in a 1-mL reaction mixture containing 10 mM styrene oxide and 200  $\mu\text{M}$  NcsF2 in 50 mM phosphate buffer (pH 8.0). During the course of the reaction, 10 mM styrene oxide and 50  $\mu\text{M}$  NcsF2 were added every hour. The reaction was allowed to proceed at 25  $^{\circ}\text{C}$  for 8 h, after which the products were extracted from the reaction mixture with 5 x 0.5 mL of ethyl acetate. The solvent was removed by evaporation under reduced pressure.  $^{18}\text{O}$ -labeled products were obtained following a similar procedure. The reactions were carried out in 0.5-mL reaction mixtures containing [ $^{18}\text{O}$ ]- $\text{H}_2\text{O}$ . For (*R*)-styrene oxide, 5 mM substrate and 6  $\mu\text{M}$  NcsF2 were added every 30 min (~80% [ $^{18}\text{O}$ ]- $\text{H}_2\text{O}$  final concentration). For (*S*)-styrene oxide, 20 mM substrate and 15  $\mu\text{M}$  NcsF2 were added every hour (~60% [ $^{18}\text{O}$ ]- $\text{H}_2\text{O}$  final concentration).

### Enantioconvergent reaction using NcsF2/SgcF co-catalysis

An enantioconvergent enzymatic preparation of (*R*)-1-phenyl-1,2-ethanediol was performed in a 10 mL reaction containing 14 mM racemic styrene oxide (16.8 mg), 35  $\mu\text{M}$  SgcF, and 10  $\mu\text{M}$  NcsF2 in 100 mM phosphate buffer (pH 8.0). After the reaction was incubated at room temperature for 2 h, another batch of fresh enzyme (22.5  $\mu\text{M}$  SgcF and 6.4  $\mu\text{M}$  NcsF2) was added to the reaction mixture and incubated at room temperature for an additional 3 h. The reaction mixture was extracted 5 times with 10 mL ethyl acetate after the styrene oxide was consumed as judged by TLC. The organic extracts were combined and dried with anhydrous  $\text{Na}_2\text{SO}_4$ . The removal of solvent gave 16.8 mg of (*R*)-1-phenyl-1,2-ethanediol (87% yield and 99% ee) as determined by chiral HPLC analysis.

**Figure S1.** SDS-PAGE analysis on a 12% acrylamide gel of purified NcsF1 (lane 1) and NcsF2 (lane 3) both with expected masses of ~44.5 kDa, and molecular weight markers (lane 2).

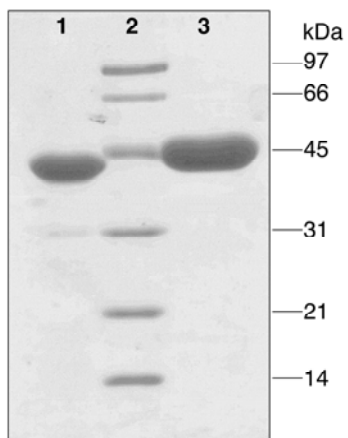

**Fig. S2.** Sequence alignment of NcsF1, NcsF2, and SgcF with selected epoxide hydrolase (EHs). The amino acid sequences were retrieved from NCBI with the following accession numbers: SgcF from *Streptomyces globisporus* (AAL06662); NcsF2 from *S. neocarzinostaticus* (AAM78002); NcsF1 from *S. neocarzinostaticus* (AAM77995); Bfueh1 from *Burkholderia fungorum* LB400 (ZP\_00284192); AnEH from *Aspergillus niger* (CAB59813); human microsomal EH (P07099); juvenile hormone EH (Q25489). Shaded regions denote sequences conserved among EHs. Active site catalytic residues are marked as follows (NcsF2 numbering): ▼, catalytic triad residues D<sup>175</sup>, D<sup>336</sup>, H<sup>363</sup>; ●, oxirane-binding residues Y<sup>235</sup> and Y<sup>304</sup>.

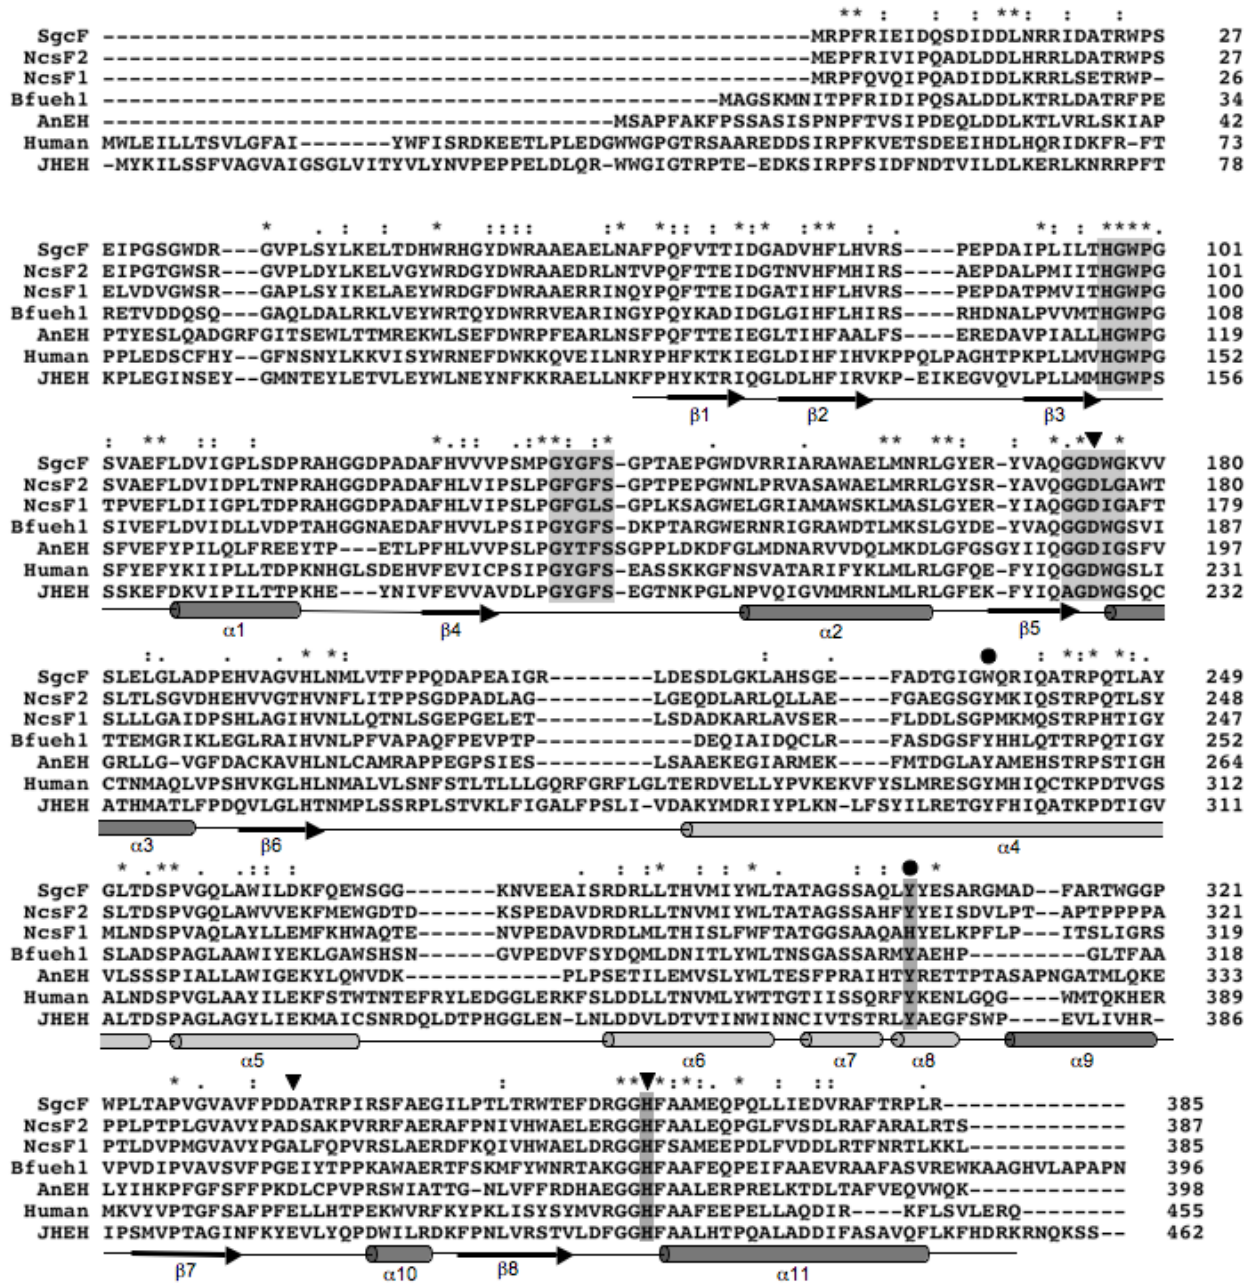

## References

- (1) Liu, W.; Nonaka, K.; Nie, L. P.; Zhang, J.; Christenson, S. D.; Bae, J.; Van Lanen, S. G.; Zazopoulos, E.; Farnet, C. M.; Yang, C. F.; Shen, B. *Chem. Biol.* **2005**, *12*, 293-302.
- (2) Lin, S.; Horsman, G. P.; Chen, Y.; Li, W.; Shen, B. *J. Am. Chem. Soc.* **2009**, *131*, 16410-16417.
- (3) Doderer, K.; Lutz-Wahl, S.; Hauer, B.; Schmid, R. D. *Anal. Biochem.* **2003**, *321*, 131-134.
- (4) Mateo, C.; Archelas, A.; Furstoss, R. *Anal. Biochem.* **2003**, *314*, 135-141.
